# Supplementary material
Source: Springer Nature journal article supplement (https://www.springermedizin.de/resource/supplementary/12935_2010_261_MOESM4_ESM.pdf/9540170)

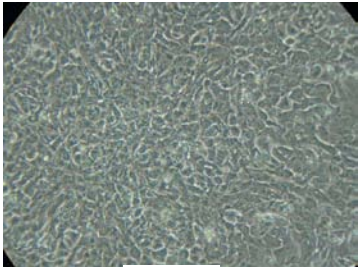

**(a)**

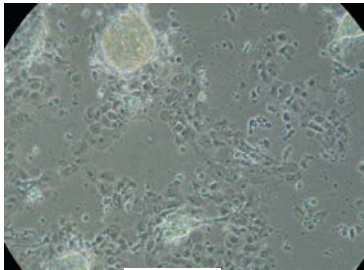

**(b)**

Supplement: MOESM4 [file 9540170]
